# Supplementary material for: Metal-agglomeration-suppressed growth of MoS2 and MoSe2 films with small sulfur and selenium molecules for high mobility field effect transistor applications
Source: Royal Society of Chemistry journal article supplement (doi:10.1039/c8nr03778g), 2018-01-01
Supplement: c8nr03778g1.pdf [file c8nr03778g1.pdf]

## Supporting Information

**Title** Metal-Agglomeration-Suppressed Growth of MoS<sub>2</sub> and MoSe<sub>2</sub> Films with Small Sulfur and Selenium Molecules for High Mobility Field Effect Transistor Applications

*Kwang Hoon Jung, Sun Jin Yun\*, Yongsuk Choi, Jeong Ho Cho, Jung Wook Lim, Hyun-Jun Chai, Dae-Hyung Cho, Yong-Duck Chung, and Gayoung Kim*

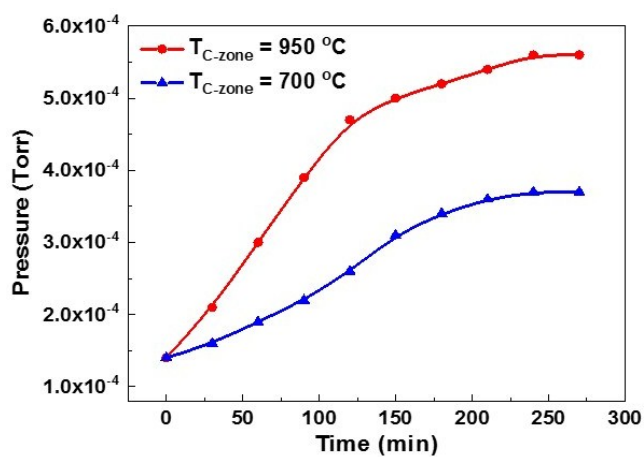

**Figure S1.** Change in chamber pressure with respect to time at T<sub>C-zone</sub> = 700 and 950 °C.

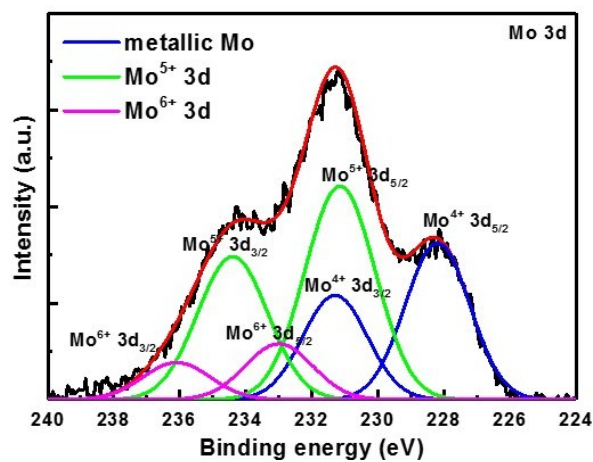

**Figure S2.** Mo 3d XPS spectrum of Mo film that was deposited to be 2 nm-thick using e-beam evaporation and exposed to air. The component peaks indicate that elemental Mo, oxidized Mo (Mo<sup>5+</sup> and Mo<sup>6+</sup>) bonding states coexist in the film. The ratio of different oxidation states of Mo was metallic Mo : Mo<sup>5+</sup> : Mo<sup>6+</sup> = 35 : 52 : 13, and the partially oxidized Mo-precursor film was approximately 2.5 nm-thick.

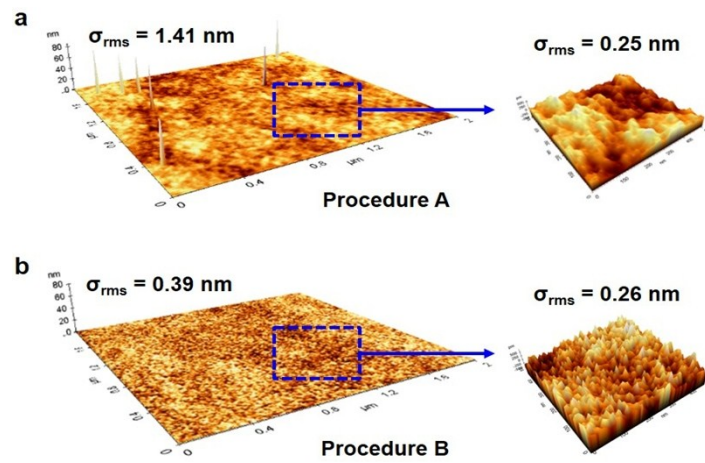

**Figure S3.** AFM images ( $2 \mu\text{m} \times 2 \mu\text{m}$ ) and rms roughness ( $\sigma_{rms}$ ) values of  $\text{MoS}_2$  films ( $T_G=500 \text{ }^\circ\text{C}$ ) of (a) procedure A and (b) procedure B. The  $\sigma_{rms}$  value of a region with no protrusions (procedure A) was also compared with that of procedure B in a selected small area ( $500 \text{ nm} \times 500 \text{ nm}$ ).

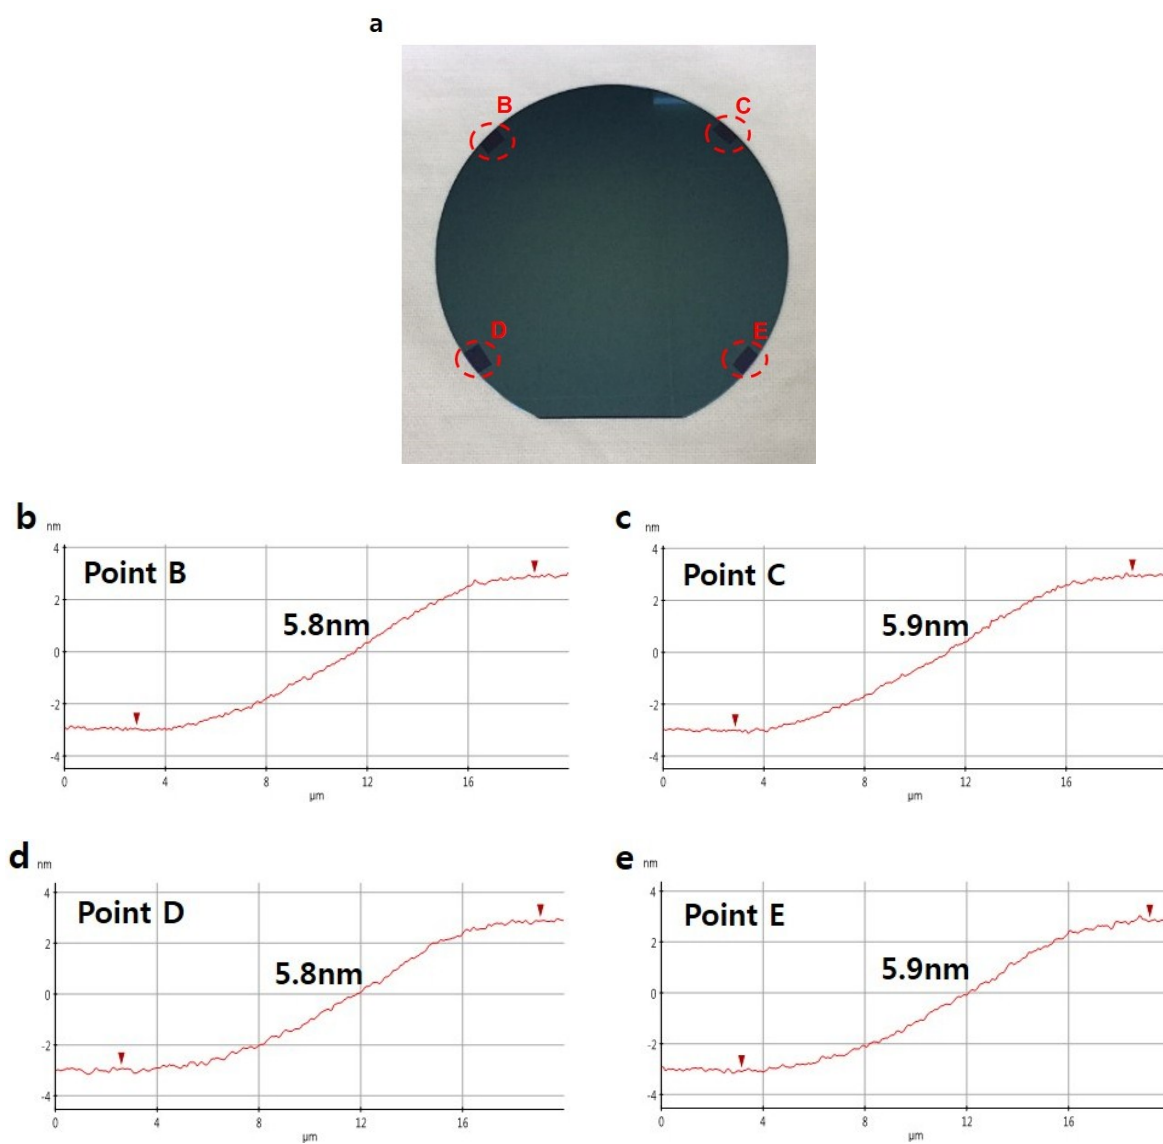

**Figure S4.** (a) Photograph of a high quality MoS<sub>2</sub> film on a 6 inch SiO<sub>2</sub>/Si wafer. Height profiles of the MoS<sub>2</sub> film at points (b) B, (c) C, (d) D, and (e) E.

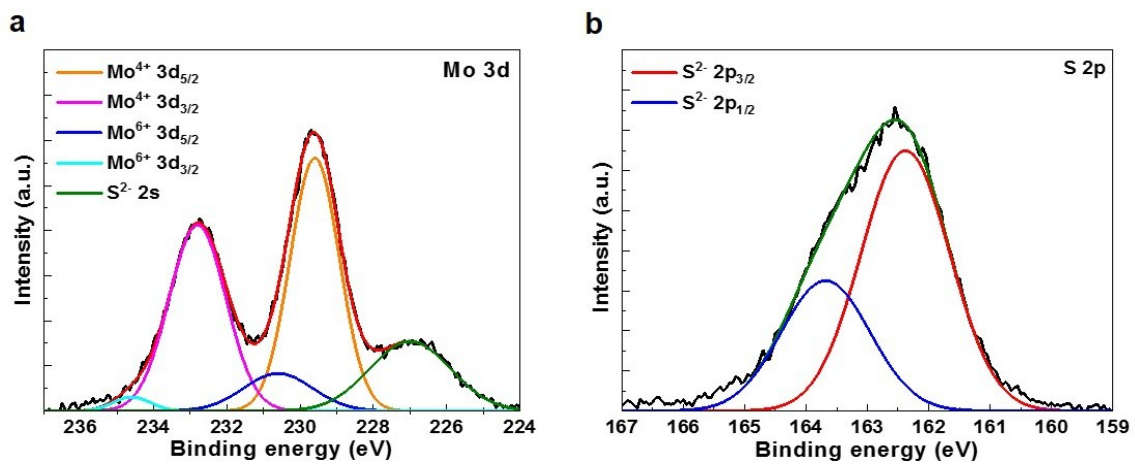

**Figure S5.** XPS peaks of (a) Mo and (b) S in a 6 nm-thick MoS<sub>2</sub> film fabricated at  $T_{R\text{-zone}} = 120\text{ }^{\circ}\text{C}$ .

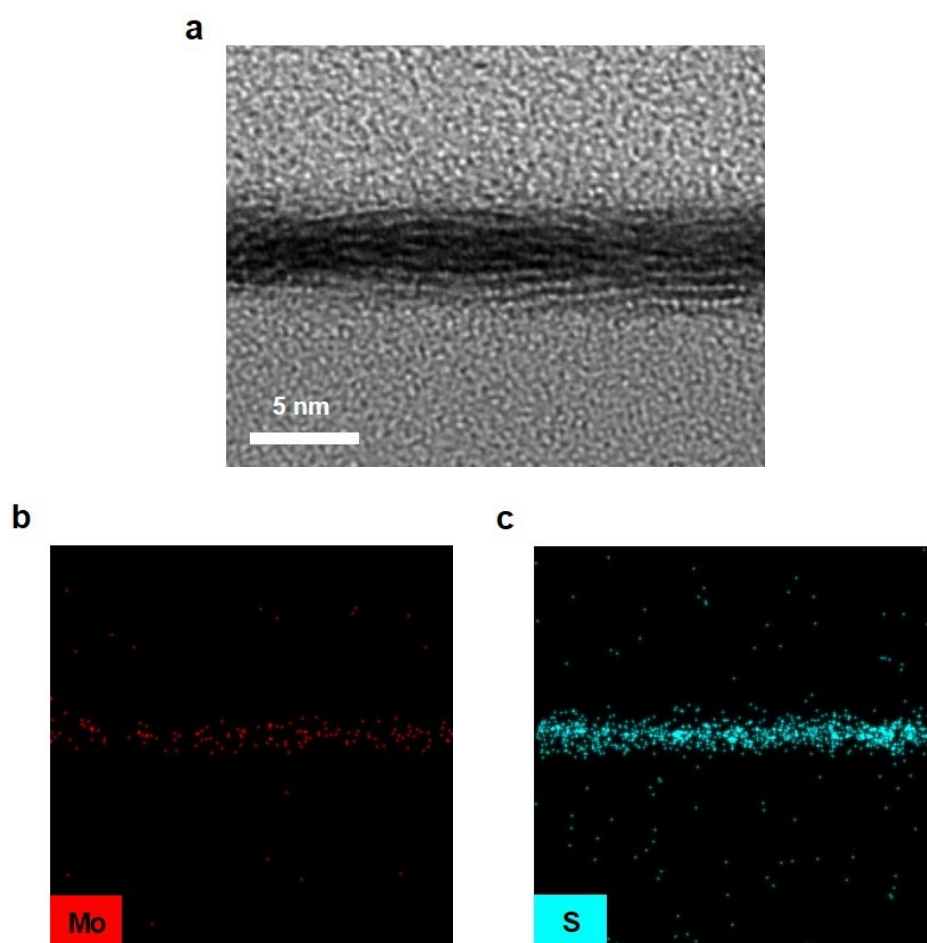

**Figure S6.** (a) A cross-sectional TEM image of a 3.1 nm-thick MoS<sub>2</sub> film. EDS maps of (b) Mo and (c) S in a 3.1 nm-thick MoS<sub>2</sub> film.

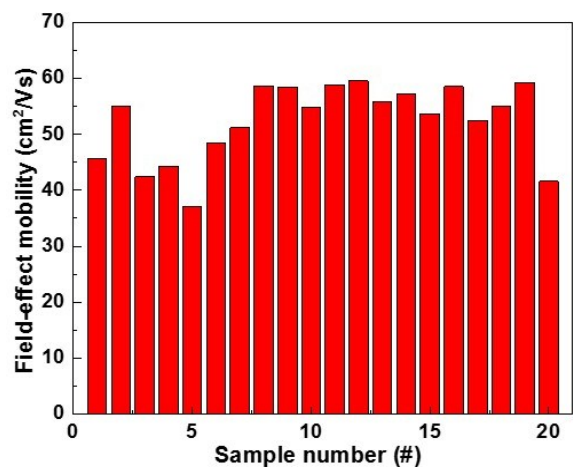

**Figure S7.** Histogram of field-effect mobility of MoS<sub>2</sub>-FETs for 20 devices fabricated on a substrate.
